# Supplementary material
Source: bioRxiv or medRxiv preprint supplement (https://medrxiv.org/highwire/filestream/90265/field_highwire_adjunct_files/2/2020.07.19.20152322-3.pdf)

**Supplementary Figure 3.** (A) Genetic Distance for the Sars-Cov-2 Sequences against Collection Date. The Pearson correlation coefficient between genetic distance and collection date is displayed in the top-right corner ( $r = 0.465$ ). Sequences are colored by sampling location (North Italy= red, other location= gray) (B) Genetic Distance for the Sars-Cov-2 Sequences against lineages.

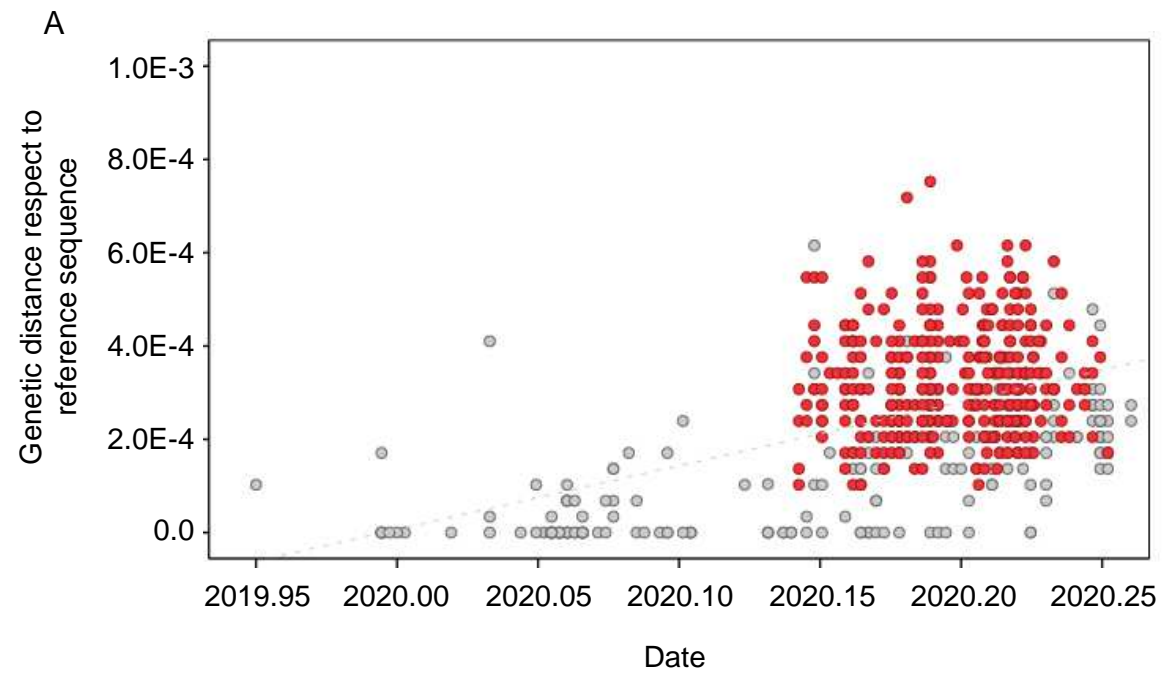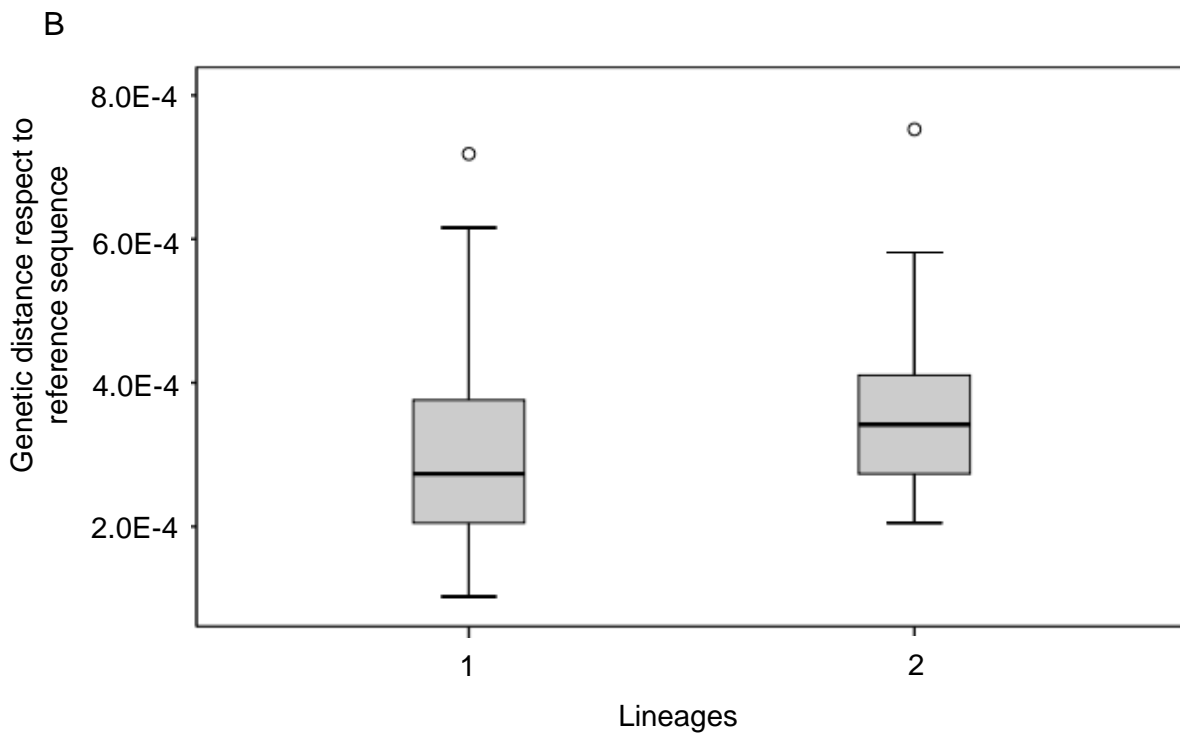

Supplement: Supplementary file [file 2020.07.19.20152322-3.pdf]
